# Supplementary material
Source: Springer Nature journal article supplement (https://www.springermedizin.de/resource/supplementary/12913_2011_1575_MOESM1_ESM.pdf/9529320)
Supplement: MOESM1 [file 9529320]

**In-home patients with HF or CHRONIC LUNG DISEASE,  
≥ 2 hospital admissions (at least 1 due to the above mentioned diseases)  
in the previous year**

N = 240 patients

**RANDOMISATION 1:1  
Stratification by disease**

**Excluded:**  
In residential care  
Frequent hospital treatment  
In terminal phase  
Cognitive impairment  
Unwilling to participate

**Intervention Group (IG)  
Home telemonitoring**

N = 30

**Baseline  
characteristics  
Homogeneity**

**Control Group (CG)  
Usual Care**

N = 30

**Patient/caregiver  
satisfaction**

**Partial results**

**3 months**

**Health care  
professional  
satisfaction**

**Partial results**

**6 months**

**Deaths  
& other losses**

**Deaths  
& other losses**

**Compliance with  
telemonitoring**

**1-YEAR ANALYSIS**

**Assessed  
n**

**Assessed  
n**
